# Supplementary material for: Immunomodulatory activity of andrographolide on macrophage activation and specific antibody response
Source: Springer Nature journal article supplement (doi:10.1038/aps.2009.205), 2010-02-01
Supplement: 41401_2010_BFaps2009205_MOESM1_ESM.pdf [file 41401_2010_BFaps2009205_MOESM1_ESM.pdf]

Supplementary Table 1. The effects of andrographolide (An) on M1/ M2 cytokines mRNA expression level in IL-13 activated macrophages.

| Stimulation Time | Cytokines detected | Mean values of cytokine mRNA expression<br>(cultured vs fresh cells) |        |                |                             |
|------------------|--------------------|----------------------------------------------------------------------|--------|----------------|-----------------------------|
|                  |                    | medium                                                               | IL-13  | IL-13 + An     |                             |
| <b>4 h</b>       |                    | medium                                                               | IL-13  | IL-13 + An     |                             |
|                  | M1                 | TNF- $\alpha$                                                        | 1.43   | 1.67           | 1.15                        |
|                  |                    | IL-12                                                                | 0.537  | 0.405          | 0.321                       |
|                  |                    | IL-1 $\beta$                                                         | 0.573  | 0.640          | <b>0.255</b> ↓ <sup>a</sup> |
|                  |                    | IL-18                                                                | 0.820  | 1.19           | 0.685                       |
|                  |                    | IL-6                                                                 | 0.303  | 0.447          | 0.297                       |
|                  | M2                 | IL-10                                                                | 0.315  | <b>1.11</b> ↑  | <b>0.525</b> ↓ <sup>a</sup> |
|                  |                    | IL-1Ra                                                               | 1.50   | 2.06           | 1.28                        |
|                  |                    | IL-18BP                                                              | 1.93   | 2.34           | 2.04                        |
|                  |                    | IL-23                                                                | 0.770  | 0.781          | 0.661                       |
|                  |                    | IL-12/IL-10                                                          | 1.71   | <b>0.364</b> ↓ | 0.611                       |
|                  |                    | IL-1 $\beta$ /IL-1Ra                                                 | 0.383  | 0.310          | 0.200                       |
|                  |                    | IL-18/IL-18BP                                                        | 0.425  | 0.507          | 0.336                       |
|                  | <b>24 h</b>        |                                                                      | medium | IL-13          | IL-13 + An                  |
| M1               |                    | TNF- $\alpha$                                                        | 1.46   | 2.15           | 1.60                        |
|                  |                    | IL-12                                                                | 0.665  | 0.412          | <b>0.139</b> ↓ <sup>a</sup> |
|                  |                    | IL-1 $\beta$                                                         | 0.268  | 0.220          | <b>0.075</b> ↓ <sup>a</sup> |
|                  |                    | IL-18                                                                | 0.880  | 1.08           | 0.561                       |
|                  |                    | IL-6                                                                 | 0.298  | 0.410          | 0.371                       |
| M2               |                    | IL-10                                                                | 0.432  | 1.33           | <b>0.218</b> ↓ <sup>a</sup> |
|                  |                    | IL-1Ra                                                               | 2.33   | <b>5.07</b> ↑  | <b>0.908</b> ↓ <sup>a</sup> |
|                  |                    | IL-18BP                                                              | 3.06   | 2.43           | <b>7.31</b> ↑ <sup>a</sup>  |
|                  |                    | IL-23                                                                | 0.268  | 0.224          | 0.383                       |
|                  |                    | IL-12/IL-10                                                          | 1.54   | <b>0.311</b> ↓ | <b>0.638</b> ↑ <sup>a</sup> |
|                  |                    | IL-1 $\beta$ /IL-1Ra                                                 | 0.115  | <b>0.043</b> ↓ | 0.083                       |
|                  |                    | IL-18/IL-18BP                                                        | 0.288  | 0.443          | <b>0.077</b> ↓ <sup>a</sup> |

Data in bold are those with >2-fold difference. ↑ up-regulation (>2-fold increase vs. medium control), ↓ down-regulation (>2-fold decrease vs medium control), ↑<sup>a</sup> up-regulation (>2-fold increase vs IL-13 treated control), ↓<sup>a</sup> down-regulation (>2-fold decrease vs IL-13 treated control).

Supplementary Table 2. The effects of andrographolide (An) on IL-23 mRNA expression level in naive and activated macrophages.

| Stimulation Time | Mean values of cytokine mRNA expression<br>(cultured <i>vs.</i> fresh cells) |                |               |                             |       |           |       |            |
|------------------|------------------------------------------------------------------------------|----------------|---------------|-----------------------------|-------|-----------|-------|------------|
|                  | medium                                                                       | An             | LPS           | LPS + An                    | IL-4  | IL-4 + An | IL-13 | IL-13 + An |
| 4 h              | 0.770                                                                        | 0.717          | <b>15.7</b> ↑ | <b>6.53</b> ↓ <sup>a</sup>  | 0.637 | 0.883     | 0.781 | 0.661      |
| 24 h             | 0.268                                                                        | <b>0.099</b> ↓ | <b>2.55</b> ↑ | <b>0.383</b> ↓ <sup>a</sup> | 0.234 | 0.328     | 0.224 | 0.383      |

Data in bold are those with >2-fold difference. ↑ up-regulation (>2-fold increase *vs* medium control), ↓ down-regulation (>2-fold decrease *vs* medium control), ↓<sup>a</sup> down-regulation (>2-fold decrease *vs* LPS-treated control).
